# Supplementary material for: Isolated flat bands and physics of mixed dimensions in a 2D covalent organic framework
Source: Royal Society of Chemistry journal article supplement (doi:10.1039/d0nr04428h), 2020-01-01
Supplement: d0nr04428h1.pdf [file d0nr04428h1.pdf]

## **Supplementary Information**

### **Isolated Flat Bands and Physics of Mixed Dimensions in a 2D Covalent Organic Framework**

*Juefan Wang<sup>1,2</sup>, Su Ying Quek<sup>1,2,\*</sup>*

<sup>1</sup>Department of Physics, National University of Singapore, 2 Science Drive 3, 117551, Singapore

<sup>2</sup>Centre for Advanced 2D Materials, National University of Singapore, Block S14, Level 6, 6 Science Drive 2, 117546, Singapore

## Methods

The thermoelectric properties of 2D-CAP were studied based on DFT and Boltzmann transport theory [1]. DFT calculations were performed within the projector augmented-wave formalism [2] as implemented in the Vienna ab initio simulation package (VASP) [3]. The generalized gradient approximation [4] was used for the exchange-correlation functional. A plane-wave basis set with a kinetic energy cutoff of 550 eV was employed. The Brillouin zone was sampled on a  $4 \times 4 \times 1$  Monkhorst-pack grid for the self-consistent field calculation and a denser k grid of  $20 \times 20 \times 1$  for the non-self-consistent field calculation to obtain the Kohn-Sham energies for computing the Seebeck coefficients. Seebeck coefficients were calculated by means of Boltzmann semiclassical theory, within the constant relaxation time approximation, using the BoltzTraP2 code [5].

The on-site Coulomb interaction  $U$  at the bridge sites is estimated following Ref. [6]. The Coulomb interaction  $U$  is given by  $U = \frac{e^2}{4\pi\epsilon\epsilon_0 d}$ , where the in-plane dielectric constant of 2D-CAP,  $\epsilon$ , is computed from density-functional-perturbation-theory, with a value of 3.1.  $d$  is estimated by first obtaining the macroscopic planar-average of the localized wavefunction charge density  $|\psi(r)|^2$ , and  $d$  is the full-width-half-maximum of this function. The value of  $d$  is 6.4 Å. Our computed  $U = 730$  meV.

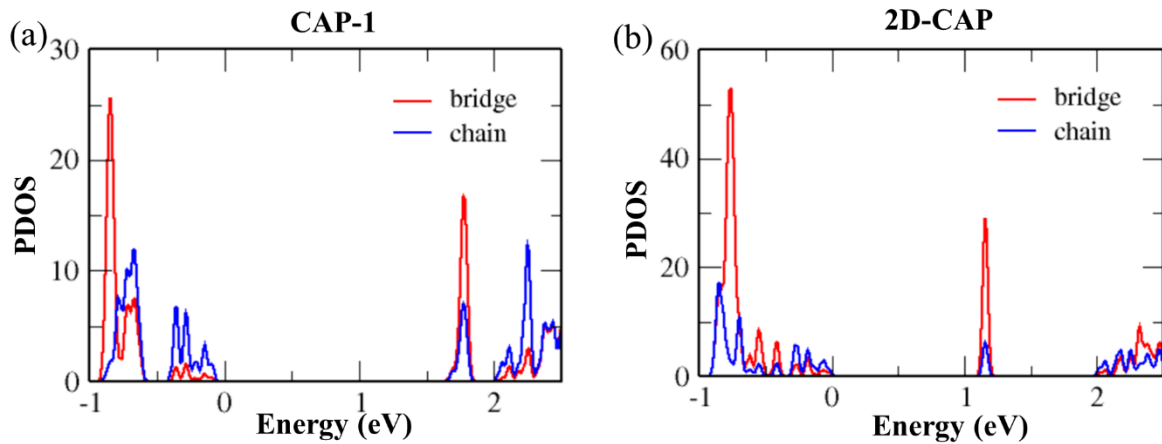

**Figure S1.** The calculated projected density of states (PDOS) of (a) monolayer CAP-1 and (b) monolayer 2D-CAP. The PDOS plots are obtained with a Gaussian broadening of 0.03 eV.

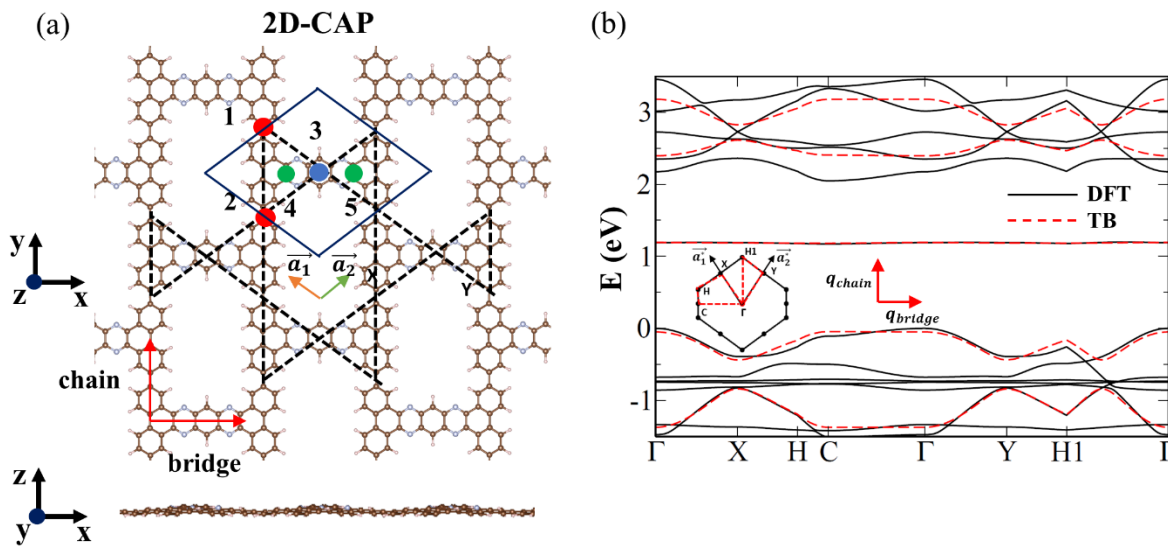

**Figure S2.** (a) The Kagome-honeycomb tight-binding (TB) model for monolayer 2D-CAP. The three Kagome sites are labelled as 1, 2 and 3, respectively. The two honeycomb sites are labelled as 4 and 5, respectively. (b) Band structure of 2D-CAP from DFT (black solid line) and TB model (red dashed line). The fitting parameters are shown in Table S1.

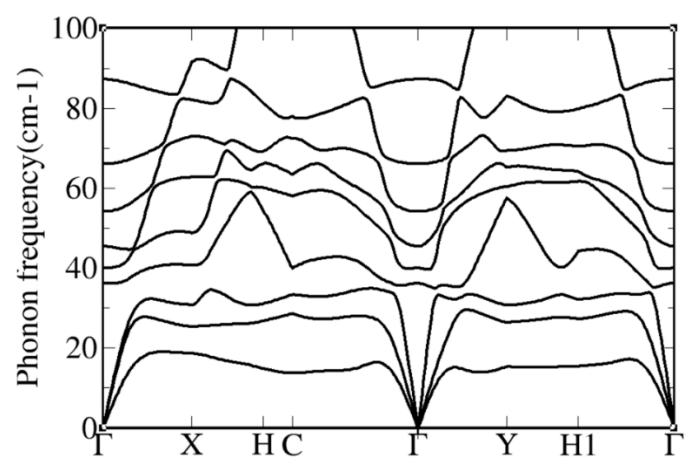

**Figure S3.** Phonon band structure of monolayer 2D-CAP.

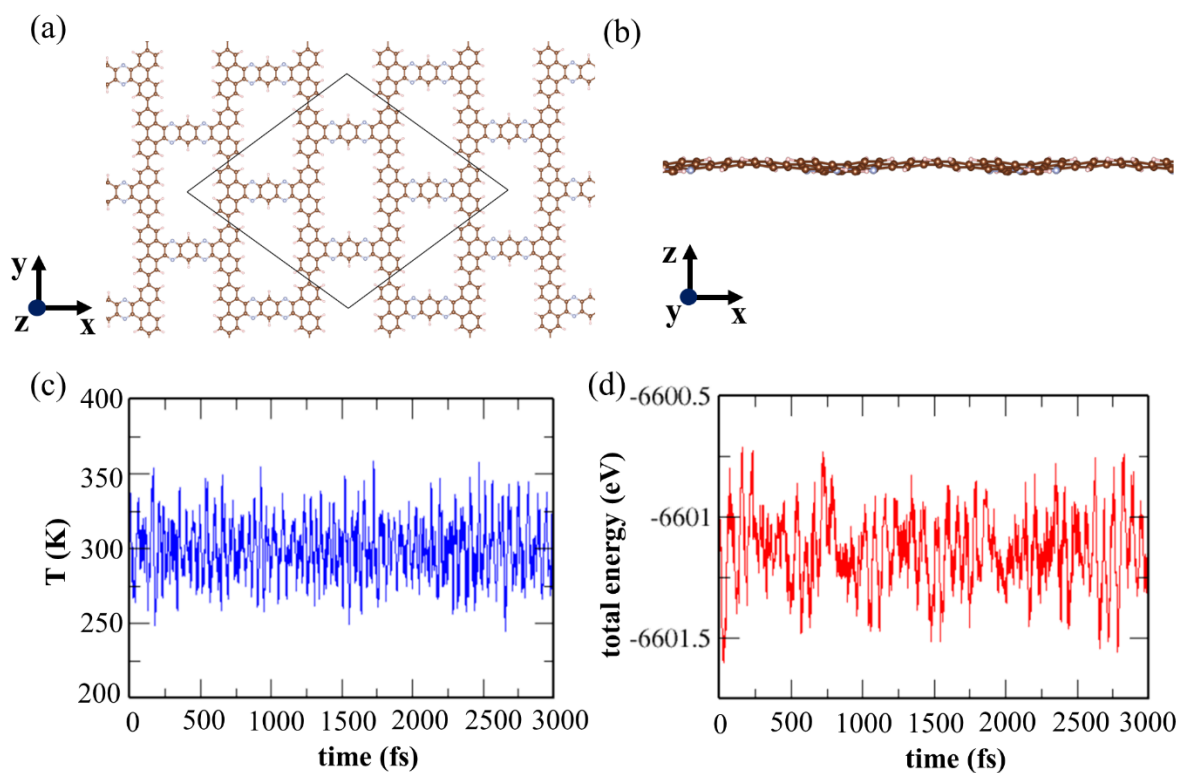

**Figure S4.** *Ab initio* molecular dynamics (MD) simulations of monolayer 2D-CAP at 300 K. (a) Top view and (b) side view of the constructed 2×2 supercell containing four primitive cells for MD simulation. The supercell is indicated by the black parallelogram. (c) Variation of temperature T (K) with respect to time iteration (fs). (d) Variation of total energy (eV) per primitive cell with respect to time iteration (fs).

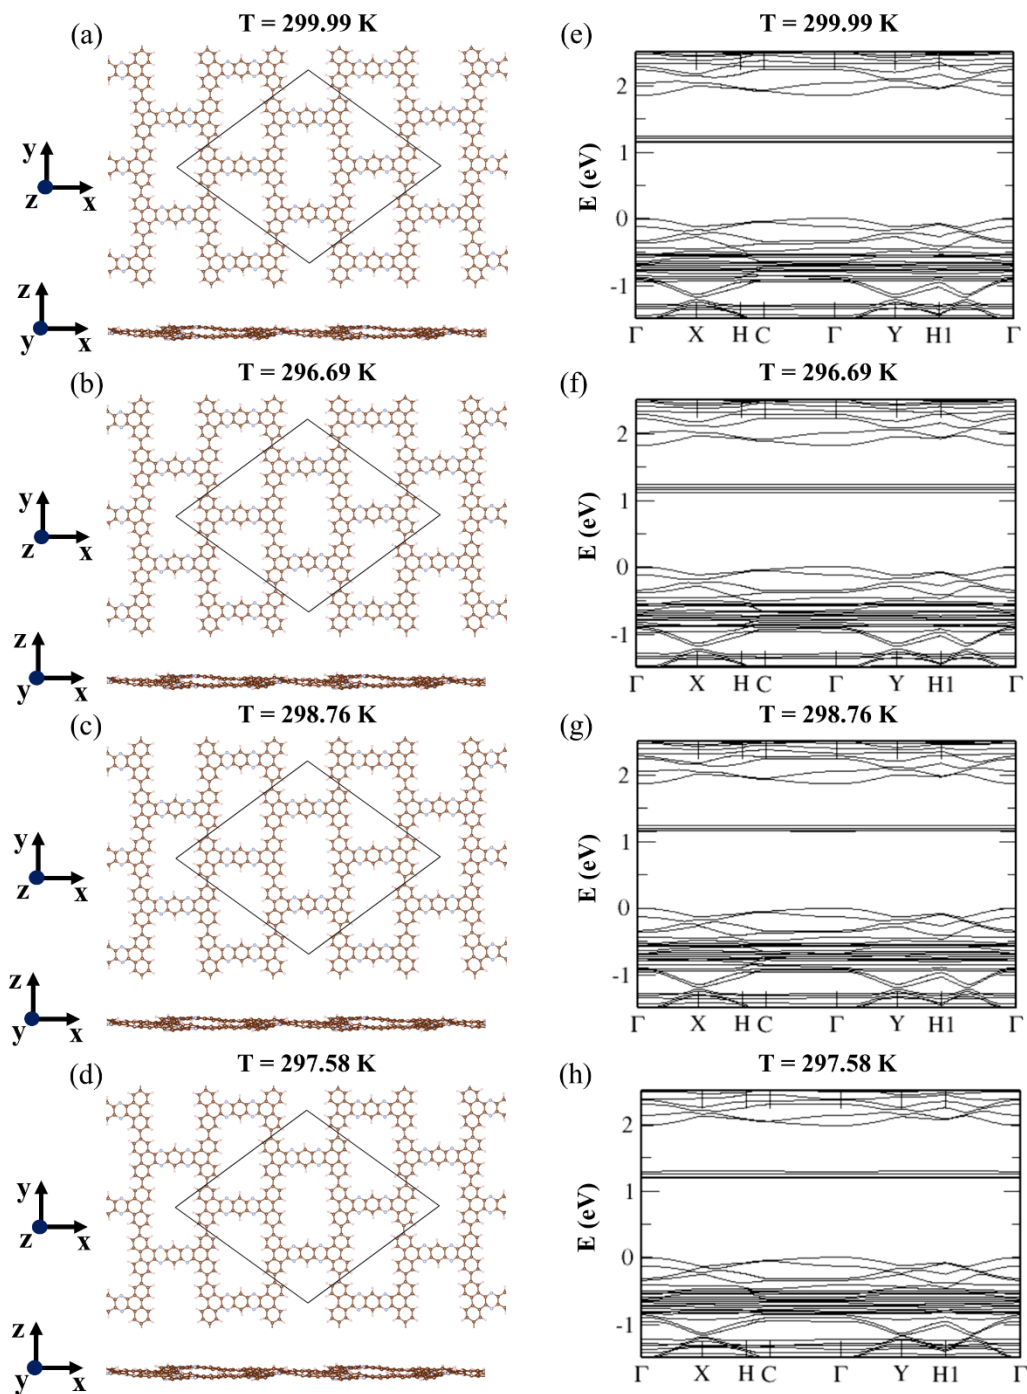

**Figure S5.** Snapshots of the (a-d) atomic structures and (e-h) band structures of monolayer 2D-CAP in the molecular dynamics simulation.

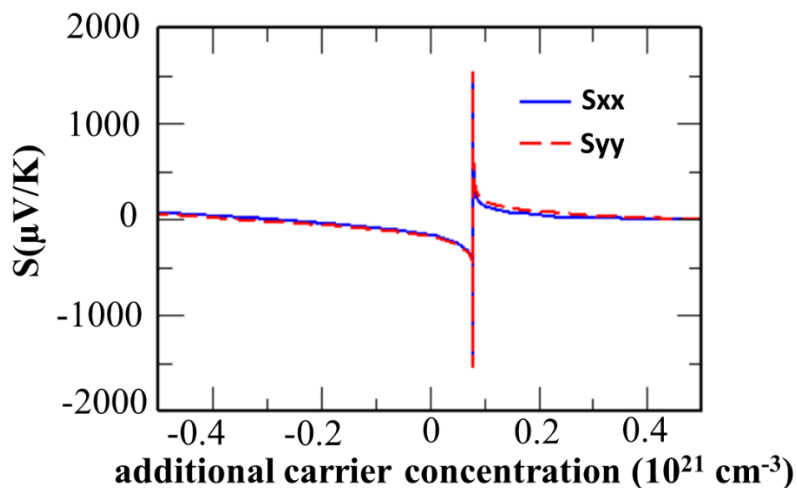

**Figure S6.** Seebeck coefficients ( $\mu\text{V/K}$ ) computed at 300 K, as a function of carrier concentration ( $10^{21}\text{cm}^{-3}$ ) of 2D-CAP doped with  $0.2\text{ e}^-$ . The simulation illustrates that spin polarization does not have a significant effect on the Seebeck coefficients, and that the rigid band approximation, used in Figure 4, works reasonably well. Directions x and y correspond to the ‘bridge’ and ‘chain’ directions, respectively.  $S_{yy}$  is slightly larger than  $S_{xx}$  because of the asymmetry in the band dispersions in the valence band.

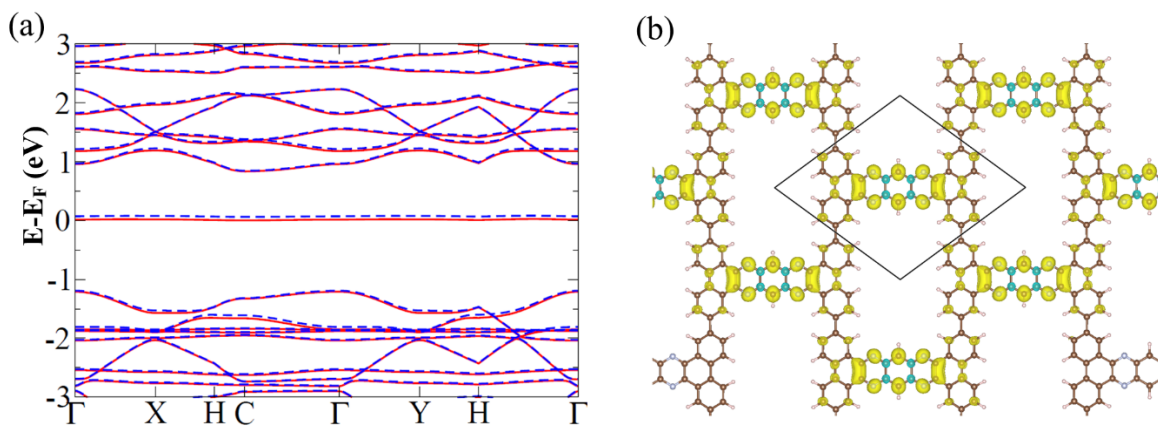

**Figure S7.** Electronic structure of 2D-CAP doped with 0.2 electrons. (a) Spin-polarized band structure. Red solid lines: majority spin, blue dashed lines: minority spin. (b) The corresponding spin density plot. The majority spin and minority spin density are indicated by yellow and green, respectively. The isosurface value is 5% of the maximum.

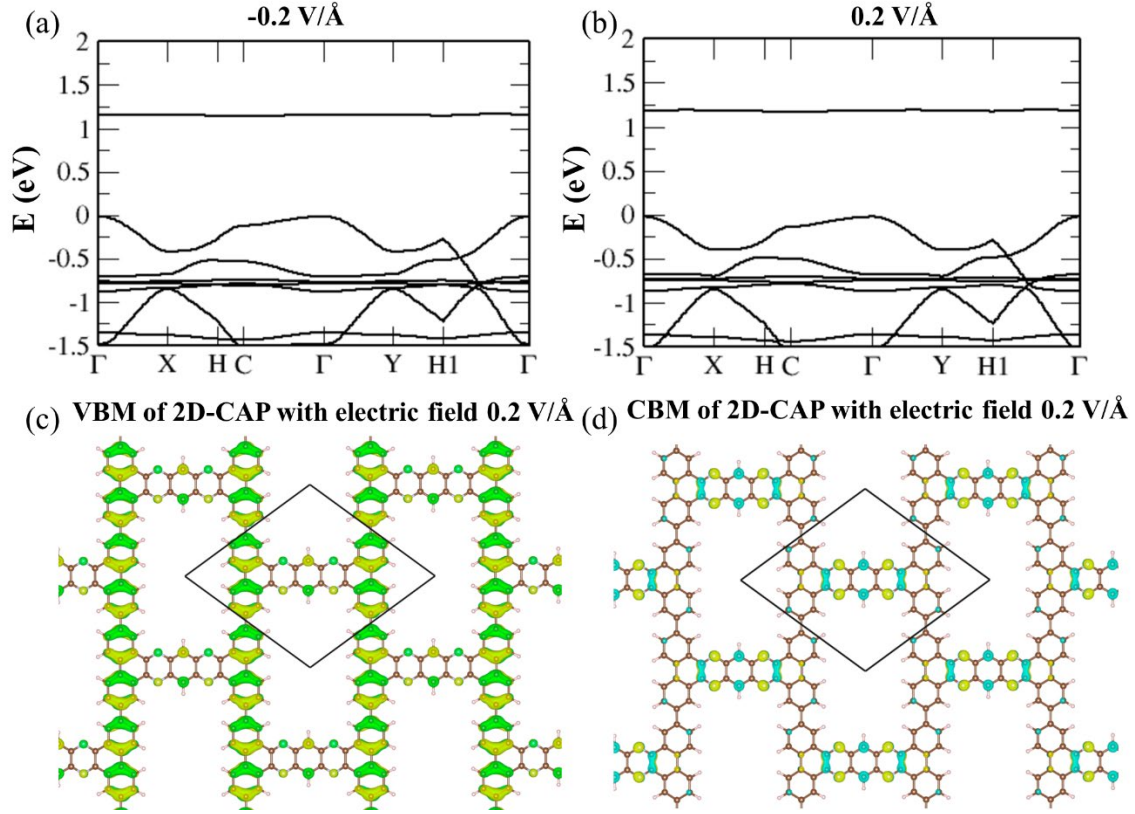

**Figure S8.** Electronic structure of monolayer 2D-CAP after applying electric fields. Band structure of monolayer 2D-CAP with electric field of (a)  $-0.2 \text{ V/\AA}$  (b)  $0.2 \text{ V/\AA}$ . Gamma point Kohn-Sham wave functions for (c) VBM and (d) CBM of 2D-CAP. Isosurface values are chosen to be 10 % of the maximum value in each case. Positive and negative values are indicated by green and yellow, respectively.

**Table S1.** Optimized tight-binding parameters (in eV) for monolayer 2D-CAP using a Kagome-honeycomb lattice model. The on-site energies of each site are indicated by  $\epsilon_i$  ( $i$  from 1 to 5). For the hopping terms, we use the following notations -  $t_1 = t_{12}(t_{21})$ : hopping between Kagome site 1 and site 2;  $t_2 = t_{13}(t_{31}) = t_{23}(t_{32})$ : hopping between Kagome site 1/2 and Kagome site 3;  $t_3 = t_{14}(t_{41}) = t_{15}(t_{51}) = t_{24}(t_{42}) = t_{25}(t_{52})$ : hopping between Kagome site 1/2 and honeycomb site 4/5;  $t_4 = t_{34}(t_{43}) = t_{35}(t_{53})$ : hopping between Kagome site 3 and honeycomb site 4/5;  $t_5 = t_{45}(t_{54})$ : hopping between honeycomb site 4 and honeycomb site 5.

| on-site energy(eV) | $\epsilon_1$ | $\epsilon_2$ | $\epsilon_3$ | $\epsilon_4$ | $\epsilon_5$ |
|--------------------|--------------|--------------|--------------|--------------|--------------|
|                    | -0.55        | -0.11        | 1.20         | 2.29         | 2.52         |
| hopping term (eV)  | $t_1$        | $t_2$        | $t_3$        | $t_4$        | $t_5$        |
|                    | 0.51         | 0.00         | 0.68         | 0.10         | 0.00         |

## References:

1. Allen, P.B. *Boltzmann Theory and Resistivity of Metals*. 1996.
2. Blöchl, P.E., *Projector augmented-wave method*. Physical Review B, 1994. **50**(24): p. 17953-17979.
3. Kresse, G. and J. Furthmüller, *Efficient iterative schemes for ab initio total-energy calculations using a plane-wave basis set*. Physical Review B, 1996. **54**(16): p. 11169-11186.
4. Perdew, J.P., K. Burke, and M. Ernzerhof, *Generalized Gradient Approximation Made Simple*. Physical Review Letters, 1996. **77**(18): p. 3865-3868.
5. Madsen, G.K.H., J. Carrete, and M.J. Verstraete, *BoltzTraP2, a program for interpolating band structures and calculating semi-classical transport coefficients*. Computer Physics Communications, 2018. **231**: p. 140-145.
6. Naik, M.H. and M. Jain, *Ultraflatbands and Shear Solitons in Moire Patterns of Twisted Bilayer Transition Metal Dichalcogenides*. Physical Review Letters, 2018. **121**(26): p. 266401.
